# Supplementary material for: Risk of Death by Unnatural Causes During Early Childhood in Offspring of Parents With Mental Illness
Source: Atypon-hosted journal article supplement (doi:10.1176/appi.ajp.2009.09070979), 2009-12-01
Supplement: ajp_167_02_198_01.pdf [file ajp_167_02_198_01.pdf]

**TABLE S1. Five-Year Survival Rates and Hazard Ratios for Unnatural Death, by Study Cohort (All Natural Deaths Excluded From Analysis)**

| Death Category and Group                                             | Mortality    |             |              |             | Crude Hazard Ratio | 95% CI     | Adjusted Hazard Ratio <sup>a</sup> | 95% CI     |
|----------------------------------------------------------------------|--------------|-------------|--------------|-------------|--------------------|------------|------------------------------------|------------|
|                                                                      | Yes<br>N (%) | No<br>N (%) | Yes<br>N (%) | No<br>N (%) |                    |            |                                    |            |
| <b>Accident</b>                                                      |              |             |              |             |                    |            |                                    |            |
| Offspring to either parents with serious mental illness <sup>b</sup> | 11           | 1.5         | 3,106        | 99.6        | 4.46***            | 2.45–8.13  | 3.65***                            | 1.99–6.66  |
| Comparison cohort <sup>c</sup>                                       | 375          | 0.1         | 467,649      | 99.9        | 1.00               |            | 1.00                               |            |
| <b>Homicide</b>                                                      |              |             |              |             |                    |            |                                    |            |
| Offspring to either parents with serious mental illness <sup>b</sup> | 6            | 0.2         | 3,106        | 99.8        | 19.84***           | 8.47–46.46 | 19.41***                           | 8.23–45.80 |
| Comparison cohort children <sup>c</sup>                              | 46           | 0.0         | 467,979      | 100.0       | 1.00               |            | 1.00                               |            |

<sup>a</sup> Adjusted for mother’s age, highest education level, marital status, diabetes, and hypertension, infant’s gender, parity, low birth weight status, family monthly income, and parental age difference.

<sup>b</sup> N=3,112.

<sup>c</sup> N=468,024.

\*\*\*p<0.001.
